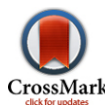

## Correction

# Correction: Helminth Induced Suppression of Macrophage Activation Is Correlated with Inhibition of Calcium Channel Activity

## The PLOS ONE Staff

There were some missing grant numbers in the funding statement. Please refer to the complete funding statement below:

This work was supported by grants RDC21418401001905 and seed grant awarded to BBM from NIH grant P30GM103329 (PI-Jonathan Geiger), NIH grants R01DE017102, and 1R03AI097532 awarded to BBS. The funders had no role in study design, data collection and analysis, decision to publish, or preparation of the manuscript.

## Reference

1. Chauhan A, Sun Y, Pani B, Quenumzangbe F, Sharma J, et al. (2014) Helminth Induced Suppression of Macrophage Activation Is Correlated with Inhibition of Calcium Channel Activity. PLoS ONE 9(7): e101023. doi:10.1371/journal.pone.0101023

---

**Citation:** The PLOS ONE Staff (2014) Correction: Helminth Induced Suppression of Macrophage Activation Is Correlated with Inhibition of Calcium Channel Activity. PLoS ONE 9(10): e111349. doi:10.1371/journal.pone.0111349

**Published:** October 13, 2014

**Copyright:** © 2014 The PLOS ONE Staff. This is an open-access article distributed under the terms of the Creative Commons Attribution License, which permits unrestricted use, distribution, and reproduction in any medium, provided the original author and source are credited.
